# Supplementary material for: Leap Motion Controller Video Game-Based Therapy for Upper Extremity Motor Recovery in Patients with Central Nervous System Diseases. A Systematic Review with Meta-Analysis
Source: PubMed Central journal article supplement (PMC7999275; doi:10.3390/s21062065), 2021-03-15
Supplement: sensors-21-02065-s001.pdf [file sensors-21-02065-s001.pdf]

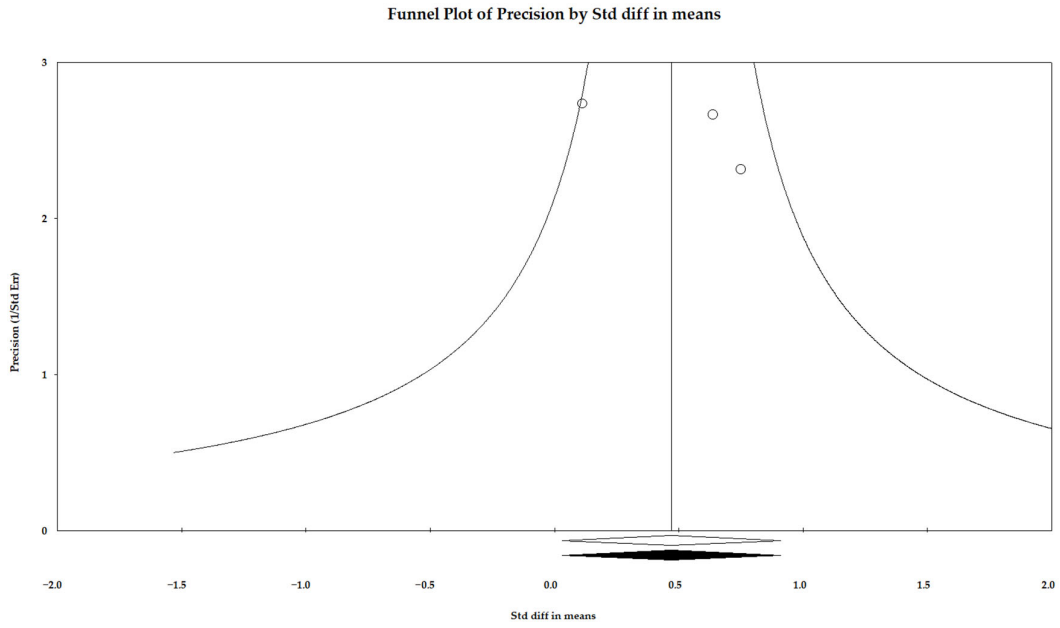

**Figure S1.** Funnel Plot of the Effect of LMC-based Therapy to Recover the Grip Strength in the Most Affected UE in Patients with non-acute CNSD.

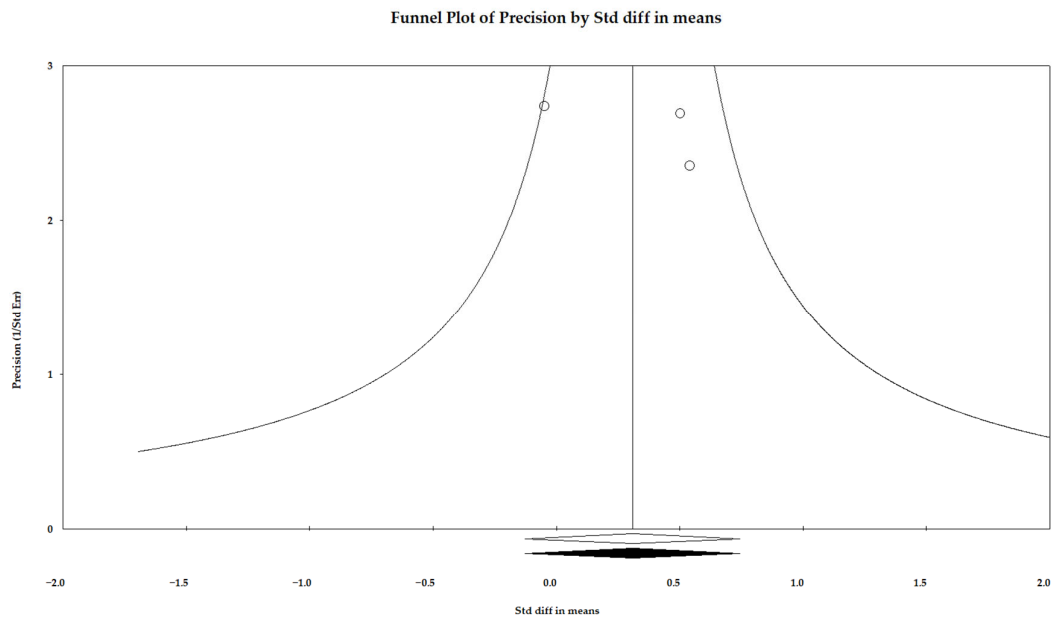

**Figure S2.** Funnel Plot of the Effect of LMC-based Therapy to Recover the Grip Strength in the Least Affected UE in Patients with non-acute CNSD.

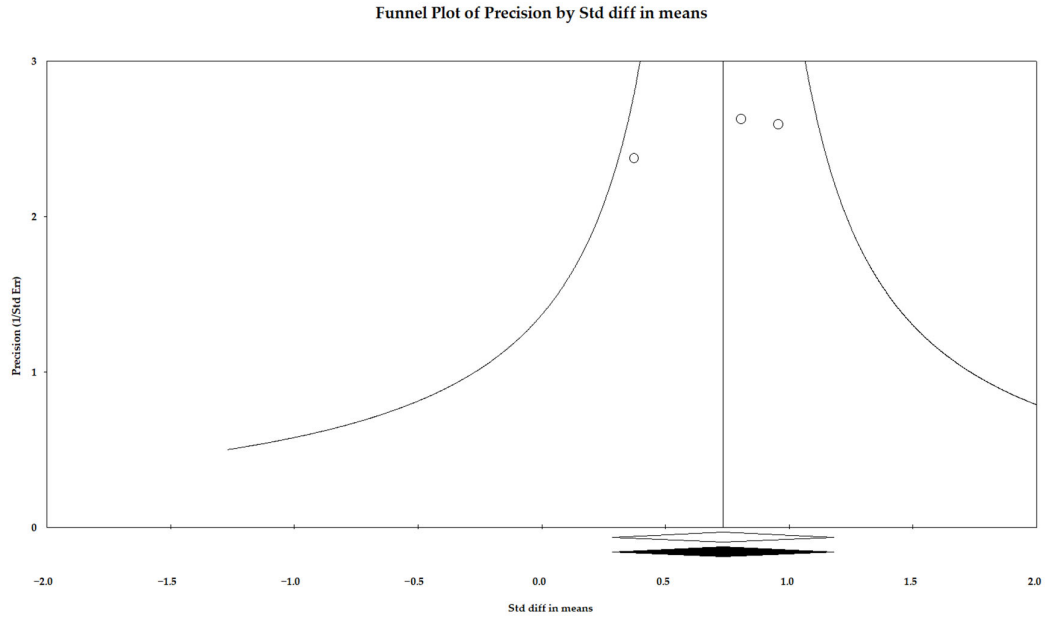

**Figure S3.** Funnel Plot of the Effect of LMC-based Therapy to Recover the Gross Motor Dexterity in the Most Affected UE in Patients with non-acute CNSD.

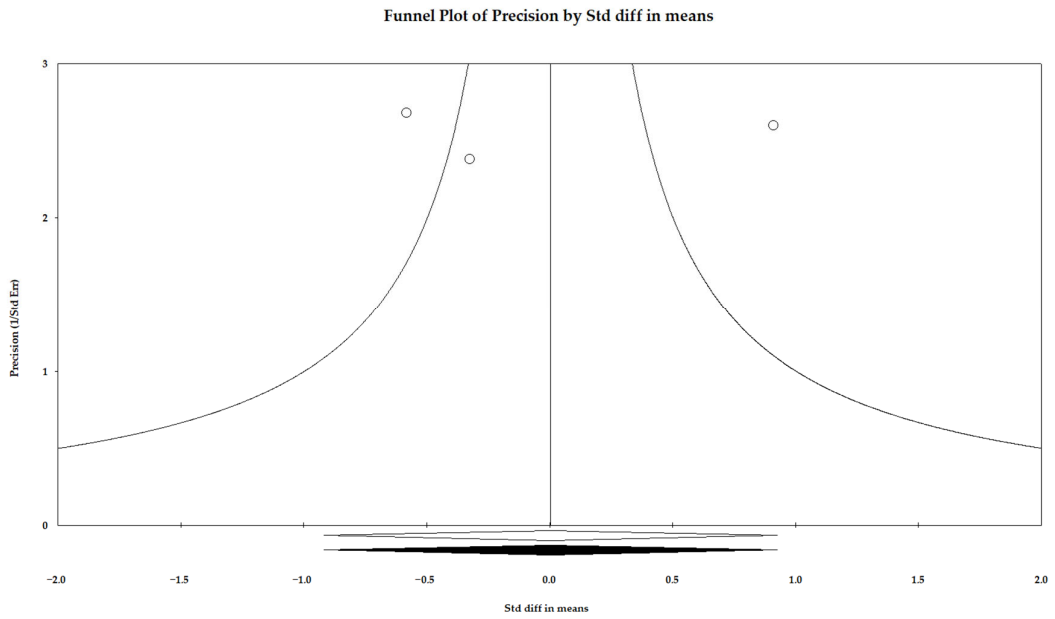

**Figure S4.** Funnel Plot of the Effect of LMC-based Therapy to Recover the Fine Motor Dexterity in Bilateral Side in Patients with non-acute CNSD.
